# Supplementary material
Source: PubMed Central journal article supplement (PMC1383646)

**Supplemental Figure 1.** Transcript Profiling of *pen3-1* and Col-0 Following Inoculation with the Arabidopsis or Barley Powdery Mildew Pathogens.

Hierarchical display of ratio values (relative to uninoculated Col-0) of 4,240 genes with altered expression in *pen3-1* mutants or Col-0 1 dpi with a powdery mildew pathogen. Of these genes, 4,226 were differentially expressed in response to treatment (i.e., uninoculated, 1 dpi with *B. graminis hordei*, 1 dpi with *E. cichoracearum*); 672 were differentially expressed in response to genotype (i.e., Col-0, *pen3-1*) including 658 genes that were also differentially expressed in response to treatment; and 8 were differentially expressed in the treatment x genotype interaction, genotype and treatment factors. Red indicates up-regulated genes, blue down-regulated genes and yellow genes with no change in expression. (U) uninfected; (E) infected with the host powdery mildew, *E. cichoracearum*; (B) infected with the nonhost powdery mildew, *B. g. hordei*.

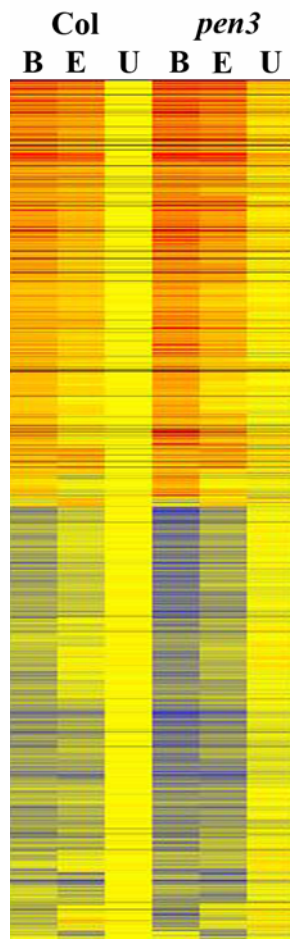

Supplement: plntcell_tpc.105.038372_1.pdf [file plntcell_tpc.105.038372_1.pdf]
