# Supplementary material
Source: PubMed Central journal article supplement (PMC1383646)
Supplement: plntcell_tpc.105.038372_2.pdf [file plntcell_tpc.105.038372_2.pdf]

**Supplemental Table 1.** Transcript levels of 12 members of the *Arabidopsis* PDR family in various tissues.<sup>a</sup>

| <b>Gene</b>  | <b>Flower (4)<br/>b</b> | <b>Leaf (4)</b> | <b>Root (3)</b> | <b>Seedling<br/>(3)</b> | <b>Silique (1)</b> | <b>Stem (4)</b> |
|--------------|-------------------------|-----------------|-----------------|-------------------------|--------------------|-----------------|
| <i>PDR1</i>  | 432 <sup>c</sup>        | 234             | 1,889           | 256                     | 422                | 1,482           |
| <i>PDR2</i>  | ns <sup>d</sup>         | ns              | 633             | 136                     | ns                 | ns              |
| <i>PDR3</i>  | 186                     | ns              | ns              | ns                      | 423                | ns              |
| <i>PDR4</i>  | 1,415                   | 1,479           | 239             | 1,244                   | 2,337              | 1,124           |
| <i>PDR5</i>  | ns                      | ns              | 516             | ns                      | ns                 | 613             |
| <i>PDR6</i>  | 776                     | 766             | 3,517           | 880                     | 974                | 1,222           |
| <i>PDR7</i>  | ns                      | ns              | 3,243           | 243                     | ns                 | ns              |
| <i>PDR8</i>  | 1,732                   | 11,479          | 3,417           | 5,399                   | 6,114              | 5,841           |
| <i>PDR9</i>  | ns                      | ns              | ns              | ns                      | ns                 | ns              |
| <i>PDR10</i> | ns                      | ns              | ns              | ns                      | ns                 | ns              |
| <i>PDR11</i> | ns                      | ns              | 2,013           | ns                      | ns                 | ns              |
| <i>PDR12</i> | ns                      | 350             | ns              | ns                      | 241                | ns              |

<sup>a</sup> Data derived from Rhee et al. 2003. *PDR13*, *PDR14*, and *PDR15* are not represented on Affymetrix ATH1 microarrays.

<sup>b</sup> Numbers in parenthesis indicate number of replicates.

<sup>c</sup> Average intensity units after data sets have been normalized to 500 (Affymetrix, MAS 5.0).

<sup>d</sup> ns, no signal detected
