# Supplementary material
Source: PubMed Central journal article supplement (PMC1383646)
Supplement: plntcell_tpc.105.038372_3.pdf [file plntcell_tpc.105.038372_3.pdf]

**Supplemental Table 2.** *PEN3* transcript levels are altered under different biotic and abiotic stresses.

| <b>Treatment</b>                         | <b>Average Fold-Induction Relative to Untreated Control</b> | <b>Source of Data</b>                         |
|------------------------------------------|-------------------------------------------------------------|-----------------------------------------------|
| <b>Biotic Stress</b>                     |                                                             |                                               |
| Chitin fragments                         | 1.4                                                         | Ramonell et al. 2005                          |
| <i>Agrobacterium tumefaciens</i>         | 1.4                                                         | NASC, Deeken_ genome                          |
| <i>Phytophthora infestans</i>            | 2.0                                                         | TAIR ID: ME00342                              |
| <i>Plectosphaerella cucumerina</i>       | 2.1                                                         | Hernandez-Blanco et al. (unpublished results) |
| flg22 elicitation, wild type             | 2.5                                                         | ArrayExpress, E-MEXP-81                       |
| flg22 elicitation, <i>fls2</i>           | 1.1                                                         | ArrayExpress, E-MEXP-81                       |
| <i>Pseudomonas syringae tomato</i> (avr) | 8.7                                                         | Glombitza et al. 2004                         |
| <i>Myzus persicae</i>                    | 6.9                                                         | De Vos et al. 2005                            |
| <b>Abiotic Stress</b>                    |                                                             |                                               |
| Methyl-jasmonate                         | 1.4                                                         | TAIR ID: ME00337                              |
| Ozone, 500 ppb                           | 2.0                                                         | NASC, Short_genome                            |
| H <sub>2</sub> O <sub>2</sub>            | 3.1                                                         | NASC, Mittler_genome_exp2                     |
| Primisulfuron                            | 6.4                                                         | Glombitza et al. 2004                         |
| Prosulfuron                              | 6.2                                                         | Glombitza et al. 2004                         |
| Heat Shock                               | 0.6                                                         | Busch et al., 2005                            |
| Abscisic acid application                | 0.3                                                         | TAIR ID: ME00333                              |
