# Supplementary material
Source: PubMed Central journal article supplement (PMC1383646)
Supplement: plntcell_tpc.105.038372_4.pdf [file plntcell_tpc.105.038372_4.pdf]

**Supplemental Table 3.** Changes in transcript levels of *PDR* family members upon powdery mildew infection in wild-type and *pen3* plants.

| <b>Treatment</b>                                     | <b><i>PEN3</i> (=PDR8)<br/>(At1g59870)</b> | <b><i>PDR4</i><br/>(At2g26910)</b> | <b><i>PDR12</i><br/>(At1g15520)</b> |
|------------------------------------------------------|--------------------------------------------|------------------------------------|-------------------------------------|
| Col-0 + <i>E. cichoracearum</i> , 1 dpi              | 1.12 <sup>a</sup>                          | 0.86                               | 1.20                                |
| Col-0 + <i>B. g. hordei</i> , 1 dpi                  | 1.18                                       | 0.74                               | 2.25                                |
| <i>pen3-1</i> , uninoculated                         | 1.02                                       | 0.94                               | 1.20                                |
| <i>pen3-1</i> + <i>E. cichoracearum</i> , 1 dpi      | 1.30                                       | 0.72                               | 3.58                                |
| <i>pen3-1</i> + <i>B. g. hordei</i> , 1 dpi          | 1.20                                       | 0.51                               | 11.40                               |
| Col-0 + <i>E. cichoracearum</i> , 3 dpi <sup>b</sup> | 1.42                                       | 0.77                               | 2.03                                |
| Col-0 + <i>P. cucumerina</i> 1 dpi <sup>c</sup>      | 2.1                                        | 0.7                                | 11.2                                |

<sup>a</sup> Numbers indicate average fold-induction relative to uninfected Col-0 (n=4 replicates).

<sup>b</sup> Data from Nishimura et al. 2003.

<sup>c</sup> Data from Hernandez-Blanco et al. (unpublished results).
