# Supplementary material
Source: PubMed Central journal article supplement (PMC1383646)
Supplement: plntcell_tpc.105.038372_5.pdf [file plntcell_tpc.105.038372_5.pdf]

**Supplemental Table 4.** Host and nonhost resistance phenotypes of mutants resistant to *Erysiphe cichoracearum*.

| Mutant                  | Phenotype with <i>E. cichoracearum</i> | Phenotype with <i>B. g. hordei</i> <sup>a</sup> | Source of Mutant                     |
|-------------------------|----------------------------------------|-------------------------------------------------|--------------------------------------|
| <i>acd1</i>             | R <sup>b</sup> + Lesions               | Like wild type                                  | Greenberg and Ausubel, 1993          |
| <i>acd2</i>             | R + Lesions                            | Some stress callose                             | Mach et al., 2001                    |
| <i>acd5</i>             | R + Lesions                            | Slightly more penetration                       | Liang et al., 2003                   |
| <i>acd6</i>             | R + Lesions                            | Severe stress callose                           | Rate et al., 1999                    |
| <i>agd2</i>             | R + Lesions                            | Severe vein callose                             | Rate and Greenberg, 2001             |
| <i>cim7<sup>c</sup></i> | R + Lesions                            | No callose                                      | Maleck et al., 2002                  |
| <i>cpr1</i>             | R + Lesions                            | Severe stress callose                           | Clarke et al., 2001                  |
| <i>cpr5</i>             | R + Lesions                            | Mesophyll and vein callose                      | “                                    |
| <i>cpr6</i>             | R                                      | Stress and mesophyll callose                    | “                                    |
| <i>dnd1</i>             | R                                      | Stress callose                                  | Clough et al., 2000                  |
| <i>dnd1</i>             | S                                      | Less callose than <i>dnd1</i>                   | “                                    |
| <i>NahG</i>             |                                        |                                                 |                                      |
| <i>edr1</i>             | R + Lesions                            | Some stress callose                             | Frye and Innes, 1998                 |
| <i>mil1</i>             | R + Lesions                            | Stress callose                                  | Vogel and Somerville,<br>unpublished |
| <i>mil2</i>             | R + Lesions                            | Some stress callose                             | “                                    |
| <i>mil4</i>             | R + Lesions                            | Stress callose                                  | “                                    |
| <i>mil5</i>             | R + Lesions                            | Stress callose                                  | “                                    |
| <i>mil6</i>             | R + Lesions                            | Like wild type                                  | “                                    |
| <i>mil7</i>             | R                                      | Increased callose deposition                    | “                                    |
| <i>mil9</i>             | R + Lesions                            | <i>pen</i> phenotype <sup>d</sup>               | “                                    |
| <i>mil10</i>            | R + Lesions                            | Like wild type                                  | “                                    |
| <i>mil12</i>            | R + Lesions                            | Slightly more penetration                       | “                                    |
| <i>mil13</i>            | R + Lesions                            | Stress callose                                  | “                                    |
| <i>mil14</i>            | R + Lesions                            | spreading mesophyll callose                     | “                                    |
| <i>mil15</i>            | R + Lesions                            | Stress callose                                  | “                                    |
| <i>mil16</i>            | R + Lesions                            | Stress callose                                  | “                                    |
| <i>mil17</i>            | R + Lesions                            | Stress callose                                  | “                                    |
| <i>mil18</i>            | R + Lesions                            | Stress and mesophyll callose                    | “                                    |
| <i>mpk4</i>             | R                                      | Necrosis and stress callose                     | Petersen et al., 2000                |
| <i>pmr1</i>             | R                                      | Like wild type                                  | Vogel and Somerville, 2000           |
| <i>pmr2</i>             | R                                      | Like wild type                                  | “                                    |
| <i>pmr3</i>             | R                                      | Like wild type                                  | “                                    |
| <i>pmr4<sup>c</sup></i> | R + Lesions                            | No callose                                      | “                                    |
| <i>pmr5</i>             | R                                      | Like wild type                                  | Vogel et al., 2004                   |
| <i>pmr6</i>             | R                                      | Like wild type                                  | Vogel et al., 2002                   |

<sup>a</sup> Plants were stained with aniline blue to visualize callose.

<sup>b</sup> R, resistant; S, susceptible.

<sup>c</sup> Sequencing of the *PMR4* gene in the *cim7* background showed *cim7* is identical in sequence to *pmr4-6*.

<sup>d</sup>The *PEN3* gene was sequenced and found to contain a point mutation that would lead to the replacement of a Trp codon in the wild type sequence to a stop codon in *mil9*.
