# Supplementary material
Source: PubMed Central journal article supplement (PMC1383646)
Supplement: plntcell_tpc.105.038372_6.pdf [file plntcell_tpc.105.038372_6.pdf]

**Supplemental Table 5.** Primer combinations used to genotype mutations by PCR.

| <b>Mutant</b>  | <b>Marker</b>    | <b>Enzyme</b> | <b>Forward and Reverse Primers (5' to 3')</b>                      |
|----------------|------------------|---------------|--------------------------------------------------------------------|
| <i>sid2-1</i>  | Caps             | MfeI          | F: TGTCTGCAGTGAAGCTTTGG<br>R: CACAAACAGCTGGAGTTGGA                 |
| <i>jar1-1</i>  | Caps             | HindIII       | F: CAGTGTGTGTGTTTTTGATCATAAGCT<br>R: CAAATTTAAACTATACCTGTTTCTGAAGG |
| <i>eds1-1</i>  | Dcaps            | HindIII       | F: CGAAGGGGACATAGATTGGA<br>R: CTTTTCATGTACGGCCCTGT                 |
| <i>coi1-1</i>  | Dcaps            | XcmI          | F: GTTTCTCTTTAGTCTTTAC<br>R: CAGACAACATTTTCGTTACC                  |
| <i>npr1-1</i>  | Caps             | NlaIII        | F: AGGCACTTGACTCGGATGAT<br>R: ATGCACTTGCACCTTTTTCC                 |
| <i>pad4-1</i>  | Caps             | BsmfI         | F: GCGATGCATCAGAAGAG<br>R: TTAGCCCAAAGCAAGTATC                     |
| <i>NahG</i>    | Presence/absence |               | F: CTGCCGCTACTCCCATATCCA<br>R: TCGGCTTCGGCTCGCTAC                  |
| <i>Etr1-1</i>  | Dcaps            | ApaLI         | F: AAGTTAATAAGATGAGTTGGTGCA<br>R: AGAAATCAGCCGTGTTTCCG             |
| <i>sgt1b-1</i> | Caps             | AvrII         | F: GGAGAGAGACAAATTCGAGCAG<br>R: GTACCTAAGGAGAACGTAACGTGTC          |
| <i>rar1-10</i> | 5 bp deletion    |               | F: CCAGTACAAAAGGCTGTGAT<br>R: ACAGTGAAAGAAAAGGGTCA                 |
| <i>pen1-1</i>  | Dcaps            | MluI          | F: GAAACACTCTTTCATGTCACGCG<br>R: GAGGACAGAGGTCCTGGTTTCG            |
| <i>pen2-3</i>  | Caps             | BsmAI         | F: TGGCAAAAGGGATAGAGGAG<br>R: CTGTAGACCCACGGCTCATT                 |
| <i>pen3-1</i>  | Caps             | HphI          | F: TGAAAGCTTCTGCTGCTCAA<br>R: TGAGGTGAACGATTTGTTGC                 |
